# Supplementary material for: Cationic gemini lipids with cyclen headgroups: interaction with DNA and gene delivery abilities
Source: Royal Society of Chemistry journal article supplement (doi:10.1039/c4ra05974c), 2014-01-01
Supplement: c4ra05974c1.pdf [file c4ra05974c1.pdf]

## Electronic Supplementary Information

### **Cationic gemini lipids with cyclen headgroups: Interaction with DNA and gene delivery abilities**

Yi-Mei Zhang, Yan-Hong Liu, Ji Zhang\*, Qiang Liu, Zheng Huang and Xiao-Qi Yu\*

*Key Laboratory of Green Chemistry and Technology (Ministry of Education), College of Chemistry, Sichuan University, Chengdu 610064, PR China*

\*Corresponding authors: xqyu@scu.edu.cn (X.-Q. Yu); jzhang@scu.edu.cn (J. Zhang). Fax: +86-28-85415886 (X.-Q. Yu)

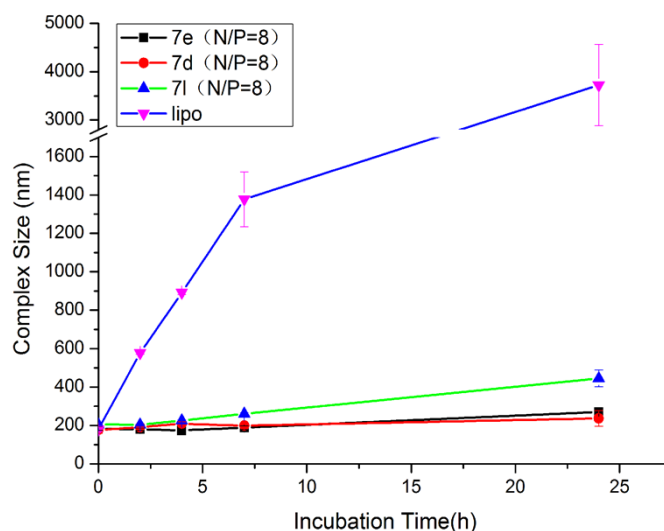

**Fig. S1** Change of particle size along with the time in Tris buffer.

#### Analytical data for novel compounds:

**4a:** (0.66 g, 0.512 mmol, yield 33%). <sup>1</sup>H NMR (400 MHz, CDCl<sub>3</sub>): δ (ppm) 0.88 (t, J=6.6 Hz, 6H, CH<sub>2</sub>-CH<sub>3</sub>), 1.25-1.34 (m, 36H, (CH<sub>2</sub>)<sub>9</sub>-CH<sub>3</sub>), 1.46 (s, 18H, boc), 1.49-1.59 (d, J=6.7 Hz, 4H, -NHCH<sub>2</sub>CH<sub>2</sub>-), 2.80-3.0 (m, 4H, NHCH<sub>2</sub>), 3.12-3.35 (m, 4H, -CH<sub>2</sub>- cystine), 4.79 (d, J=3.9 Hz, 2H, -CH- of cystine);

**4b:** (0.65 g, 0.789 mmol, yield 39.3%). <sup>1</sup>H NMR (400 MHz, CDCl<sub>3</sub>): δ (ppm) 0.88 (t, J=6.6 Hz, 6H, CH<sub>2</sub>-CH<sub>3</sub>), 1.25-1.34 (m, 44H, -CH<sub>2</sub>(CH<sub>2</sub>)<sub>11</sub>CH<sub>3</sub>), 1.46 (s, 18H, boc), 1.49-1.59 (m, 4H, NHCH<sub>2</sub>CH<sub>2</sub>), 2.80-3.0 (m, 4H, -NHCH<sub>2</sub>-), 3.12-3.35 (m, 4H, -CH<sub>2</sub>- cystine), 4.79 (d, J=3.9 Hz, 2H, -CH-, cystine);

**4c:** (0.588 g, 0.664 mmol, yield 33.2%). <sup>1</sup>H NMR (400 MHz, CDCl<sub>3</sub>): δ (ppm) 0.88 (t, J=6.6 Hz, 6H, CH<sub>2</sub>-CH<sub>3</sub>), 1.25-1.34 (m, 52H, -(CH<sub>2</sub>)<sub>13</sub>-CH<sub>3</sub>), 1.46 (s, 18H, boc), 1.49-1.59 (m, 4H, -NHCH<sub>2</sub>CH<sub>2</sub>-), 2.80-3.0 (m, 4H, -NHCH<sub>2</sub>), 3.12-3.35 (m, 4H, -CH<sub>2</sub>-cystine), 4.79 (d, J=3.9 Hz, 2H, -CH- cystine);

**4d:** (0.835g, 0.886 mmol, yield 44.3%). <sup>1</sup>H NMR (400 MHz, CDCl<sub>3</sub>): δ (ppm) 0.88 (t, J=6.4 Hz, 6H, -CH<sub>2</sub>-CH<sub>3</sub>), 1.25-1.34 (m, 60H, -(CH<sub>2</sub>)<sub>15</sub>-CH<sub>3</sub>), 1.46 (s, 18H, boc), 1.49-1.59 (m, 4H, -NHCH<sub>2</sub>CH<sub>2</sub>), 2.80-3.0 (m, 4H, -NHCH<sub>2</sub>-), 3.12-3.35 (m, 4H, CH<sub>2</sub>-cystine), 4.79 (d, J=4.1 Hz, 2H, CH-cystine);

**4e:** (0.944 g, 1.006 mmol, yield 50.3%). <sup>1</sup>H NMR (400 MHz, CDCl<sub>3</sub>): δ (ppm) 0.88 (t, J=6.4 Hz, 6H, -CH<sub>2</sub>CH<sub>3</sub>), 1.25-1.34 (m, 44H, -CH=CHCH<sub>2</sub>(CH<sub>2</sub>)<sub>6</sub>CH<sub>3</sub> and -CH=CHCH<sub>2</sub>(CH<sub>2</sub>)<sub>5</sub>CH<sub>2</sub>NH- of double chains), 1.46 (s, 18H, Boc), 1.49-1.59 (m, 4H, -NHCH<sub>2</sub>CH<sub>2</sub>-), 2.0 (s, 8H, -CH<sub>2</sub>CH=CHCH<sub>2</sub>-), 2.80-3.0 (m, 4H, -CH<sub>2</sub>- cystine), 3.12-3.35 (m,

4H, -NHCH<sub>2</sub>-), 4.79 (d, J=4.0 Hz, 2H, CH-cystine), 5.27-5.41 (s, 4H, -CH=CH-), 7.69 (s, 2H, -CONH-);

**4f**: (0.846 g, 0.904 mmol, yield 45.2%). <sup>1</sup>H NMR (400 MHz, CDCl<sub>3</sub>): δ (ppm) 0.90 (t, J=6.9 Hz, 6H, -CH<sub>2</sub>CH<sub>3</sub>), 1.25-1.41 (m, 32H, CH<sub>3</sub>(CH<sub>2</sub>)<sub>3</sub>CH<sub>2</sub>- and -NHCH<sub>2</sub>CH<sub>2</sub>(CH<sub>2</sub>)<sub>5</sub>- of double chains), 1.48 (s, 18H, Boc), 1.49-1.59 (m, 4H, -NHCH<sub>2</sub>CH<sub>2</sub>-), 2.0-2.1 (m, 8H, -CH<sub>2</sub>CH=CH- and -CH=CHCH<sub>2</sub>- of double chains), 2.75-2.82 (t, J=6.5 Hz, 4H, -CH=CHCH<sub>2</sub>CH=CH-), 2.86-3.01 (m, 4H, CH<sub>2</sub>-cystine), 3.1-3.3 (m, 4H, -NHCH<sub>2</sub>-), 4.75-4.85 (d, J=4.0 Hz, 2H, CH-cystine), 5.30-5.44 (m, 8H, -CH=CH-), 7.65-7.75 (t, 2H, -CONHCH<sub>2</sub>-)

**4g**: (0.499 g, 0.642 mmol, yield 32.1%). <sup>1</sup>H NMR (400 MHz, CDCl<sub>3</sub>): δ (ppm) 0.88 (t, J=6.6 Hz, 6H, -CH<sub>2</sub>CH<sub>3</sub>), 1.23-1.34 (m, 40H, -CH<sub>3</sub>(CH<sub>2</sub>)<sub>10</sub>CH<sub>2</sub>- of double chains), 1.45 (s, 18H, Boc), 1.60-1.68 (m, 4H, -OCH<sub>2</sub>CH<sub>2</sub>-), 3.08-3.23 (m, 4H, CH<sub>2</sub>-cystine), 4.07-4.20 (m, 4H, -COOCH<sub>2</sub>-), 4.5-4.68 (m, 2H, CH-cystine);

**4h**: (0.719 g, 0.764 mmol, yield 38.2%). <sup>1</sup>H NMR (400 MHz, CDCl<sub>3</sub>): δ (ppm) 0.90 (t, J=6.6 Hz, 6H, CH<sub>2</sub>-CH<sub>3</sub>), 1.27-1.40 (m, 44H, -CH=CHCH<sub>2</sub>(CH<sub>2</sub>)<sub>6</sub>CH<sub>3</sub> and -CH=CHCH<sub>2</sub>(CH<sub>2</sub>)<sub>5</sub>CH<sub>2</sub>NH- of double chains), 1.46 (s, 18H, Boc), 1.59-1.71 (m, 8H, -OCH<sub>2</sub>CH<sub>2</sub>CH<sub>2</sub>-), 2.07 (q, J=6.8 Hz, 8H, -CH<sub>2</sub>CH=CHCH<sub>2</sub>-), 2.76-2.82 (t, J=6.5 Hz, 4H, -CH=CHCH<sub>2</sub>CH=CH-), 3.12-3.35 (m, 4H, CH<sub>2</sub>-cystine), 4.12-4.22 (m, 4H, -COOCH<sub>2</sub>-), 4.60 (dd, J=12.8, 5.2 Hz, 2H, CH-cystine), 5.27-5.41 (m, 4H, -CH=CH-);

**4i**: (0.664 g, 0.708 mmol, yield 35.4%). <sup>1</sup>H NMR (400 MHz, CDCl<sub>3</sub>): δ (ppm) 0.9 (t, J=6.8 Hz, 6H, -CH<sub>2</sub>CH<sub>3</sub>), 1.25-1.41 (m, 28H, CH<sub>3</sub>(CH<sub>2</sub>)<sub>3</sub>CH<sub>2</sub>- and -OCH<sub>2</sub>CH<sub>2</sub>CH<sub>2</sub>(CH<sub>2</sub>)<sub>4</sub>- of double chains), 1.48 (s, 18H, Boc), 1.54-1.71 (m, 8H, -OCH<sub>2</sub>CH<sub>2</sub>CH<sub>2</sub>-), 1.99-2.05 (dd, J=12.1, 6.3 Hz, 8H, -CH<sub>2</sub>CH=CH- and -CH=CHCH<sub>2</sub>- of double chains), 3.10-3.21 (d, J=4.9 Hz, 4H, CH<sub>2</sub>-cystine), 4.08 (m, 4H, -COOCH<sub>2</sub>-), 4.54-4.64 (m, 2H, CH-cystine), 5.30-5.46 (m, 8H, -CH=CH-);

**4j**: (0.598 g, 0.508 mmol, yield 25.4%). <sup>1</sup>H NMR (400 MHz, CDCl<sub>3</sub>): δ (ppm) 0.55-2.40 (m, 86H, cholesterol skeleton), 1.48 (s, 18H, Boc), 3.1-3.2 (m, 2H, chol), 3.07-3.5 (m, 4H, -CH<sub>2</sub>-cystine), 4.7-4.9 (m, 2H, -CH-, cystine), 5.3-5.4 (m, 2H, chol);

**4k**: (0.679 g, 0.536 mmol, yield 26.8%). <sup>1</sup>H NMR (400 MHz, CDCl<sub>3</sub>): δ (ppm) 0.80-0.88 (m, 24H, -CHCH<sub>3</sub>, tocopheryl), 1.1-1.4 (m, 36H, -(CH<sub>2</sub>)<sub>9</sub>- tocopheryl), 1.45 (s, 6H, -CH<sub>3</sub> tocopheryl, 18H, Boc), 1.67-1.86 (m, 4H, CH<sub>2</sub>- tocopheryl), 1.93 (s, 6H, -CH<sub>3</sub> tocopheryl), 2.00 (s, 6H, -CH<sub>3</sub>, tocopheryl), 2.12 (s, 6H, CH<sub>3</sub>- tocopheryl), 2.58-2.62 (t, J=6.5 Hz, 4H, -CH<sub>2</sub>- tocopheryl), 3.2-3.55 (dd, J=13.7, 6.8 Hz, 4H, -CH<sub>2</sub>, cystine), 4.9-5.0 (d, J=5.6 Hz, 2H, CH-cystine);

**6a:** (0.723 g, 0.452 mmol, yield 45.2%). <sup>1</sup>H NMR (400 MHz, CDCl<sub>3</sub>): δ (ppm) 0.88 (t, J=6.8 Hz, 6H, -CH<sub>2</sub>-CH<sub>3</sub>), 1.22-1.35 (m, 36H, -(CH<sub>2</sub>)<sub>9</sub>CH<sub>3</sub>), 1.40-1.48 (d, J=9.5 Hz, 54H, Boc), 2.7-3.0 (m, 4H, -NHCH<sub>2</sub>-), 8H, -CH<sub>2</sub>- cyclen), 3.08-3.57 (m, 24H, -CH<sub>2</sub>- cyclen, 4H, -CH<sub>2</sub>- cystine, 4H, -NHCH<sub>2</sub>CO-), 5.2 (d, J=4.5 Hz, 2H, -CH-, cystine); <sup>13</sup>C NMR (100 MHz, CDCl<sub>3</sub>): δ (ppm): 14.2, 22.5, 27.3, 28.4, 29.5, 32.1, 39.6, 53.2, 79.8, 155.9, 169.3, 169.5, 170.9; HR-MS (ESI): C<sub>80</sub>H<sub>150</sub>N<sub>12</sub>O<sub>16</sub>S<sub>2</sub>, [M+H]<sup>+</sup>: 1600.0812, found: 1600.0809;

**6b:** (0.728 g, 0.44 mmol, yield 44.0%). <sup>1</sup>H NMR (400 MHz, CDCl<sub>3</sub>): δ (ppm) 0.88 (t, J=6.7 Hz, 6H, -CH<sub>2</sub>CH<sub>3</sub>), 1.25-1.34 (m, 44H, -(CH<sub>2</sub>)<sub>11</sub>CH<sub>3</sub>), 1.46 (d, J=9.4 Hz, 54H, Boc), 1.49-1.59 (m, 4H, -NHCH<sub>2</sub>CH<sub>2</sub>-), 2.80-3.0 (m, 4H, -NHCH<sub>2</sub>-), 8H, -CH<sub>2</sub>- cyclen), 3.12-3.35 (m, 4H, -CH<sub>2</sub>-, cystine, 24H, -CH<sub>2</sub>-, cyclen, 4H, -NCH<sub>2</sub>CO-), 4.79 (dd, J=14.0, 9.4 Hz, 2H, -CH-, cystine); <sup>13</sup>C NMR (100 MHz, CDCl<sub>3</sub>): δ (ppm): 13.9, 22.0, 26.3, 28.0, 28.3, 28.7, 28.78, 28.9, 29.0, 29.9, 31.3, 51.4, 65.1, 71.2, 78.5, 155.4, 170.9; HR-MS (ESI): C<sub>84</sub>H<sub>158</sub>N<sub>12</sub>O<sub>16</sub>S<sub>2</sub> [M+H]<sup>+</sup>: 1656.1438, found: 1656.1433;

**6c:** (0.684 g, 0.4 mmol, yield 40.0%). <sup>1</sup>H NMR (400 MHz, CDCl<sub>3</sub>): δ (ppm) 0.88 (t, J=6.7 Hz, 6H, -CH<sub>2</sub>CH<sub>3</sub>), 1.19-1.37 (m, 52H, -(CH<sub>2</sub>)<sub>13</sub>CH<sub>3</sub>), 1.40-1.48 (d, J=13.5 Hz, 54H, Boc), 1.49-1.52 (m, 4H, -NHCH<sub>2</sub>CH<sub>2</sub>-), 2.7-3.0 (m, 4H, -NHCH<sub>2</sub>-), 8H, -CH<sub>2</sub>-, cyclen), 3.08-3.57 (m, 24H, -CH<sub>2</sub>-, cyclen, 4H, -CH<sub>2</sub>-, cystine, 4H, -NHCH<sub>2</sub>CO-), 5.0-5.28 (dd, J=14.0, 9.5 Hz, 2H, -CH-, cystine); <sup>13</sup>C NMR (100 MHz, CDCl<sub>3</sub>): δ (ppm): 13.9, 22.0, 28.0, 28.7, 29.0, 31.3, 51.7, 78.2, 155.1, 169.5; HR-MS (ESI): C<sub>88</sub>H<sub>166</sub>N<sub>12</sub>O<sub>16</sub>S<sub>2</sub>, [M+H]<sup>+</sup>: 1712.2064, found: 1712.2064;

**6d:** (0.864 g, 0.489 mmol, yield 48.9%). <sup>1</sup>H NMR (400 MHz, CDCl<sub>3</sub>): δ (ppm) 0.88 (t, J=6.7 Hz, 6H, -CH<sub>2</sub>CH<sub>3</sub>), 1.22-1.35 (m, 60H, -(CH<sub>2</sub>)<sub>15</sub>CH<sub>3</sub>), 1.40-1.48 (d, J=10.1 Hz, 54H, Boc), 1.48-1.52 (m, 4H, -NHCH<sub>2</sub>CH<sub>2</sub>-), 2.7-3.0 (m, 4H, -NHCH<sub>2</sub>-), 8H, -CH<sub>2</sub>-, cyclen), 3.08-3.57 (m, 24H, -CH<sub>2</sub>-, cyclen, 4H, -CH<sub>2</sub>-cystine, 4H, -NHCH<sub>2</sub>CO-), 5.2 (dd, J=14.2, 9.4 Hz, 2H, -CH-, cystine); <sup>13</sup>C NMR (100 MHz, CDCl<sub>3</sub>): δ (ppm): 13.9, 22.2, 28.9, 31.1, 54.4, 79.0, 155.2, 170.1; HR-MS (ESI): C<sub>92</sub>H<sub>174</sub>N<sub>12</sub>O<sub>16</sub>S<sub>2</sub>, [M+H]<sup>+</sup>: 1768.2690, found: 1768.2673;

**6e:** (0.917 g, 0.52 mmol, yield 52.0%). <sup>1</sup>H NMR (400 MHz, CDCl<sub>3</sub>): δ (ppm) 0.88 (t, J=6.5 Hz, 6H, -CH<sub>2</sub>CH<sub>3</sub>), 1.22-1.35 (m, 44H, -(CH<sub>2</sub>)<sub>11</sub>CH<sub>3</sub>), 1.40-1.48 (d, J=7.4 Hz, 54H, Boc), 1.48-1.55 (m, 4H, -NHCH<sub>2</sub>CH<sub>2</sub>-), 1.92-2.08 (m, 8H, -CHCH<sub>2</sub>), 2.8-3.0 (m, 4H, -NHCH<sub>2</sub>-), 8H, -CH<sub>2</sub>-cyclen), 3.08-3.73 (m, 24H, -CH<sub>2</sub>- cyclen, 4H, -CH<sub>2</sub>- cystine, 4H, -NHCH<sub>2</sub>CO-), 5.2 (dd, J=13.9, 9.2 Hz, 2H, -CH- cystine), 5.2-5.4 (m, 4H, -CH=CH-); <sup>13</sup>C NMR (100 MHz, CDCl<sub>3</sub>): δ (ppm): 13.9, 22.0, 28.0, 28.3, 28.7, 29.0, 30.0, 31.3, 51.7, 78.2, 128.6, 131.8, 155.1, 169.8, 170.9; HR-MS (ESI): C<sub>92</sub>H<sub>170</sub>N<sub>12</sub>O<sub>16</sub>S<sub>2</sub>, [M+H]<sup>+</sup>: 1764.2377, found: 1764.2291;

**6f:** (0.739 g, 0.42 mmol, yield 42.0%). <sup>1</sup>H NMR (400 MHz, CDCl<sub>3</sub>): δ (ppm) 0.9 (t, J=6.7 Hz, 6H, -CH<sub>2</sub>CH<sub>3</sub>), 1.22-1.39 (m, 32H, CH<sub>3</sub>(CH<sub>2</sub>)<sub>3</sub>CH<sub>2</sub>- and -NHCH<sub>2</sub>CH<sub>2</sub>(CH<sub>2</sub>)<sub>5</sub>- of double

chains), 1.41-1.55 (d,  $J=9.7$  Hz, 54H, Boc), 2.0-2.1 (m, 8H,  $-\text{CH}_2\text{CH}=\text{CH}-$  and  $-\text{CH}=\text{CHCH}_2-$  of double chains), 2.75-2.82 (t,  $J=6.4$  Hz, 4H,  $-\text{CH}=\text{CHCH}_2\text{CH}=\text{CH}-$ ), 2.82-3.04 (m, 4H,  $-\text{NHCH}_2-$ , 8H,  $-\text{CH}_2-$  cyclen), 3.08-3.73 (m, 24H,  $-\text{CH}_2-$  cyclen, 4H,  $-\text{CH}_2-$  cystine, 4H,  $-\text{NHCH}_2\text{CO}-$ ), 4.75-4.85 (m, 2H,  $-\text{CH}-$  cystine), 5.20-5.44 (m, 8H,  $-\text{CH}=\text{CH}-$ ), 7.8 (s, 2H,  $-\text{CONHCH}_2-$ );  $^{13}\text{C}$  NMR (100 MHz,  $\text{CDCl}_3$ )  $\delta$  (ppm): 14.1, 22.5, 25.6, 27.1, 28.5, 29.3, 31.5, 39.7, 53.2, 79.8, 127.9, 130.0, 130.2, 156.2, 169.5, 170.8; HR-MS (ESI):  $\text{C}_{92}\text{H}_{166}\text{N}_{12}\text{O}_{16}\text{S}_2$ ,  $[\text{M}+\text{H}]^+$  : 1760.2064, found: 1760.2063;

**6g**: (0.711 g, 0.44 mmol, yield 44.4%).  $^1\text{H}$  NMR (400 MHz,  $\text{CDCl}_3$ ):  $\delta$  (ppm) 0.88 (t,  $J=6.8$  Hz, 6H,  $-\text{CH}_2\text{CH}_3$ ), 1.25-1.36 (m, 40H,  $-\text{CH}_3(\text{CH}_2)_{10}\text{CH}_2-$  of double chains), 1.39-1.51 (d,  $J=11.1$  Hz, 54H, Boc), 1.60-1.70 (m, 4H,  $-\text{OCH}_2\text{CH}_2-$ ), 2.82-3.04 (m, 8H,  $-\text{CH}_2-$ , cyclen), 3.08-3.73 (m, 24H,  $-\text{CH}_2-$  cyclen, 4H,  $-\text{CH}_2-$  cystine, 4H,  $-\text{NHCH}_2\text{CO}-$ ), 4.07-4.20 (t,  $J=6.8$  Hz, 4H,  $-\text{COOCH}_2-$ ), 4.5-4.68 (m, 2H,  $\text{CH}-$  cystine);  $^{13}\text{C}$  NMR (100 MHz,  $\text{CDCl}_3$ )  $\delta$  (ppm): 14.1, 22.7, 25.8, 28.5, 29.6, 31.9, 40.3, 51.6, 66.0, 79.6, 156.1, 170.1, 170.7; HR-MS (ESI):  $\text{C}_{80}\text{H}_{148}\text{N}_{10}\text{O}_{18}\text{S}_2$ ,  $[\text{M}+\text{H}]^+$  : 1602.0493, found: 1602.0491;

**6h**: (0.797 g, 0.45 mmol, yield 45.1%).  $^1\text{H}$  NMR (400 MHz,  $\text{CDCl}_3$ ):  $\delta$  (ppm) 0.89 (t,  $J=6.7$  Hz, 6H,  $-\text{CH}_2\text{CH}_3$ ), 1.23-1.36 (m, 44H,  $-\text{CH}=\text{CHCH}_2(\text{CH}_2)_6\text{CH}_3$  and  $-\text{CH}=\text{CHCH}_2(\text{CH}_2)_5\text{CH}_2\text{NH}-$  of double chains), 1.40-1.56 (d,  $J=11.5$  Hz, 54H, Boc), 1.59-1.69 (m, 4H,  $-\text{OCH}_2\text{CH}_2-$ ), 2.0 (m, 8H,  $-\text{CH}_2\text{CH}=\text{CHCH}_2-$ ), 2.69-2.95 (m, 8H,  $-\text{CH}_2-$ , cyclen), 3.06-3.24 (m, 4H,  $-\text{CH}_2-$ , cystine), 3.24-3.68 (m, 24H,  $-\text{CH}_2-$ , cyclen, 4H,  $-\text{NHCH}_2\text{CO}-$ ), 4.12-4.22 (q,  $J=6.5$  Hz, 4H,  $-\text{COOCH}_2-$ ), 4.80 (dd,  $J=12.8, 6.5$  Hz, 2H,  $-\text{CH}-$  cystine), 5.29-5.41 (m, 4H,  $-\text{CH}=\text{CH}-$ );  $^{13}\text{C}$  NMR (100 MHz,  $\text{CDCl}_3$ ):  $\delta$  (ppm): 14.1, 22.7, 25.8, 27.2, 28.5, 29.3, 29.7, 32.9, 40.3, 51.6, 58.4, 66.0, 79.7, 129.7, 129.9, 170.1, 170.7; HR-MS (ESI):  $\text{C}_{92}\text{H}_{168}\text{N}_{10}\text{O}_{18}\text{S}_2$ ,  $[\text{M}+\text{H}]^+$  : 1766.2058, found: 1766.2050;

**6i**: (0.670 g, 0.38 mmol, yield 38.0%).  $^1\text{H}$  NMR (400 MHz,  $\text{CDCl}_3$ ):  $\delta$  (ppm) 0.9 (t,  $J=6.3$  Hz, 6H,  $\text{CH}_2-\text{CH}_3$ ), 1.22-1.40 (m, 28H,  $\text{CH}_3(\text{CH}_2)_3\text{CH}_2-$  and  $-\text{OCH}_2\text{CH}_2\text{CH}_2(\text{CH}_2)_4-$  of double chains), 1.48 (d,  $J=11.3$  Hz, 54H, Boc), 1.60-1.70 (dd,  $J=13.3, 7.0$  Hz, 4H,  $-\text{OCH}_2\text{CH}_2-$ ), 1.99-2.12 (m, 8H,  $-\text{CH}_2\text{CH}=\text{CH}-$  and  $-\text{CH}=\text{CHCH}_2-$  of double chains), 2.68-3.00 (m, 4H,  $-\text{CH}=\text{CHCH}_2\text{CH}=\text{CH}-$ , 8H,  $-\text{CH}_2-$ , cyclen), 3.10-3.21 (m, 4H,  $\text{CH}_2-$  cystine), 3.25-3.66 (m, 24H,  $-\text{CH}_2-$ , cyclen, 4H,  $-\text{NHCH}_2\text{CO}-$ ), 4.13 (t,  $J=6.4$  Hz, 4H,  $-\text{COOCH}_2-$ ), 4.80 (m, 2H,  $\text{CH}-$  cystine), 5.27-5.46 (m, 8H,  $-\text{CH}=\text{CH}-$ );  $^{13}\text{C}$  NMR (100 MHz,  $\text{CDCl}_3$ ):  $\delta$  (ppm): 14.2, 22.5, 25.8, 27.2, 29.2, 29.6, 31.5, 40.3, 51.6, 66.0, 79.7, 127.9, 130.0, 130.2, 156.4, 170.2, 170.7; HR-MS (ESI):  $\text{C}_{92}\text{H}_{164}\text{N}_{10}\text{O}_{18}\text{S}_2$ ,  $[\text{M}+\text{H}]^+$  : 1762.1745, found: 1762.1740;

**6j**: (0.741 g, 0.37 mmol, yield 37.0%).  $^1\text{H}$  NMR (400 MHz,  $\text{CDCl}_3$ ):  $\delta$  (ppm) 0.55-2.40 (m, 86H, cholesterol skeleton), 1.48 (d,  $J=10.6$  Hz, 54H, Boc), 2.69-2.95 (m, 8H,  $-\text{CH}_2-$  cyclen),

3.06-3.24 (m, 4H, -CH<sub>2</sub>-,cystine), 3.24-3.68 (m, 24H, -CH<sub>2</sub>-, cyclen), 4.79 (dd, J=13.0, 6.1 Hz, 2H, -CH-, cystine), 5.3-5.4 (m, 2H, chol); <sup>13</sup>C NMR (100 MHz, CDCl<sub>3</sub>) δ (ppm): 11.8, 18.7, 19.3, 21.0, 22.5, 22.8, 23.8, 24.3, 28.0, 28.5, 31.8, 35.6, 36.2, 36.6, 36.9, 37.9, 39.5, 42.3, 50.0, 51.8, 56.2, 56.7, 75.8, 79.9, 123.0, 139.2, 156.2, 169.5, 170.6; HR-MS (ESI): C<sub>110</sub>H<sub>188</sub>N<sub>10</sub>O<sub>18</sub>S<sub>2</sub>, [M+H]<sup>+</sup> : 2003.3656, found: 2003.3658;

**6k**: (0.926 g, 0.443 mmol, yield 44.3%). <sup>1</sup>H NMR (400 MHz, CDCl<sub>3</sub>): δ (ppm) 0.68-0.95 (m, 24H, -CHCH<sub>3</sub>, tocopheryl), 0.97-1.33 (m, 36H, -(CH<sub>2</sub>)<sub>9</sub>- tocopheryl), 1.34-1.60 (s, 6H, -CH<sub>3</sub> tocopheryl, 54H, Boc), 1.70-1.86 (m, 4H -CH<sub>2</sub>- tocopheryl), 1.96 (s, 6H, -CH<sub>3</sub> tocopheryl), 1.99 (s, 6H, -CH<sub>3</sub>, tocopheryl), 2.06 (s, 6H, -CH<sub>3</sub> tocopheryl), 2.58-2.62 (d, J=3.2 Hz, 4H, -CH<sub>2</sub>-, tocopheryl), 2.66–2.95 (m, 8H, -CH<sub>2</sub>-, cyclen), 3.11-3.66 (m, 4H, -CH<sub>2</sub>- cystine, 24H, -CH<sub>2</sub>-, cyclen.), 5.14 (dd, J=12.1, 6.9 Hz, 2H, -CH-,cystine); <sup>13</sup>C NMR (100 MHz, CDCl<sub>3</sub>) δ (ppm): 11.8, 12.3, 13.1, 18.4, 19.6, 20.6, 22.6, 24.4, 24.8, 28.0, 31.0, 32.8, 37.4, 39.4, 40.0, 51.8, 58.3, 79.7, 117.4, 123.1, 140.3, 149.6, 169.1, 171.1; HR-MS (ESI): C<sub>114</sub>H<sub>196</sub>N<sub>10</sub>O<sub>20</sub>S<sub>2</sub>, [M+H]<sup>+</sup>: 2091.4181, found: 2091.4175;

**7a**: (245 mg, 0.128 mmol, yield 82.0%). <sup>1</sup>H NMR ( 400 MHz, DMSO-d<sub>6</sub>): δ (ppm) 0.85 (t, J=6.6 Hz, 6H, -CH<sub>2</sub>CH<sub>3</sub>), 1.17-1.30 (m, 36H, (CH<sub>2</sub>)<sub>9</sub>-CH<sub>3</sub>), 1.33-1.42 (m, 4H, -NHCH<sub>2</sub>CH<sub>2</sub>-), 2.7-3.2 (m, 4H, -NHCH<sub>2</sub>-, 32H, -CH<sub>2</sub>-cyclen, 4H, CH<sub>2</sub>-cystine), 3.27-3.43 (m, 4H, -NCH<sub>2</sub>CO-), 5.2 (s, 2H, -CH-cystine); <sup>13</sup>C NMR (100 MHz, DMSO-d<sub>6</sub>) δ (ppm): 13.9, 22.0, 26.2, 28.9, 31.3, 40.75, 42.37, 42.66, 44.25, 49.13, 52.21, 54.35, 169.2, 171.4; HR-MS (ESI): C<sub>50</sub>H<sub>102</sub>N<sub>12</sub>O<sub>4</sub>S<sub>2</sub>, [M+H]<sup>+</sup>: 998.7588, found: 999.7664.

**7b**: (245 mg, 0.124 mmol, yield 82.4%). <sup>1</sup>H NMR (400 MHz, DMSO-d<sub>6</sub>): δ (ppm) 0.85 (t, J=6.6 Hz, 6H, -CH<sub>2</sub>CH<sub>3</sub>), 1.2-1.27 (m, 44H, -(CH<sub>2</sub>)<sub>11</sub>CH<sub>3</sub>), 1.31-1.45 (m, 4H, -NHCH<sub>2</sub>CH<sub>2</sub>), 2.66-3.21 (m, 4H, -NHCH<sub>2</sub>, 32H, -CH<sub>2</sub>- cyclen, 4H, -CH<sub>2</sub>- cystine), 3.27-3.43(m, 4H, -NCH<sub>2</sub>CO-), 4.44-4.54 (s, 2H, -CH- cystine); <sup>13</sup>C NMR (100 MHz, DMSO-d<sub>6</sub>) δ (ppm): 13.9, 22.1, 26.4, 28.7, 28.76, 28.9, 29.0, 31.34, 40.8, 42.35, 42.7, 44.5, 49.0, 52.2, 54.4, 169.0, 171.7; HR-MS (ESI): C<sub>54</sub>H<sub>110</sub>N<sub>12</sub>O<sub>4</sub>S<sub>2</sub>, [M+H]<sup>+</sup> : 1055.8293, found: 1055.8289.

**7c**: (254 mg, 0.126 mmol, yield 86.0%). <sup>1</sup>H NMR (400 MHz, DMSO-d<sub>6</sub>): δ (ppm) 0.85 (t, J=6.6 Hz, 6H, -CH<sub>2</sub>CH<sub>3</sub>), 1.2-1.27 (m, 52H, -(CH<sub>2</sub>)<sub>13</sub>CH<sub>3</sub>), 1.31-1.45 (m, 4H, -NHCH<sub>2</sub>CH<sub>2</sub>), 2.66-3.21 (m, 4H, -NHCH<sub>2</sub>, 32H, -CH<sub>2</sub>- cyclen, 4H, -CH<sub>2</sub>- cystine), 3.27-3.43 (m, 4H, -NCH<sub>2</sub>CO-), 4.44-4.54 (dd, J=13.8, 7.9 Hz, 2H, -CH-cystine); <sup>13</sup>C NMR(100 MHz, DMSO-d<sub>6</sub>) δ (ppm): 13.9, 22.0, 26.5, 28.9, 31.3, 40.7, 42.37, 42.71, 44.3, 49.1, 52.2, 54.4, 169.0, 171.7; HR-MS (ESI): C<sub>58</sub>H<sub>118</sub>N<sub>12</sub>O<sub>4</sub>S<sub>2</sub>, [M+H]<sup>+</sup> : 1111.8919 , found: 1111.8909;

**7d**: (262 mg, 0.126 mmol, yield 89.0%). <sup>1</sup>H NMR (400 MHz, DMSO-d<sub>6</sub>): δ (ppm) 0.85 (t, J=6.7 Hz, 6H, -CH<sub>2</sub>CH<sub>3</sub>), 1.2-1.27 (m, 60H, -(CH<sub>2</sub>)<sub>15</sub>CH<sub>3</sub>), 1.31-1.45(m, 4H, -NHCH<sub>2</sub>CH<sub>2</sub>-),

2.69-3.22 (m, 4H, -NHCH<sub>2</sub>-, 32H, -CH<sub>2</sub>- cyclen, 4H, -CH<sub>2</sub>- cystine), 3.27-3.43 (m, 4H, -NCH<sub>2</sub>CO-), 4.44-4.54 (dd, J=13.9, 8.1 Hz, 2H, -CH- cystine); <sup>13</sup>C NMR (100 MHz, DMSO-d<sub>6</sub>) δ (ppm): 13.7, 22.2, 26.5, 28.9, 31.3, 40.8, 42.4, 42.8, 44.3, 49.2, 52.2, 54.5, 169.3, 171.4, HR-MS (ESI): C<sub>62</sub>H<sub>126</sub>N<sub>12</sub>O<sub>4</sub>S<sub>2</sub>, [M+H]<sup>+</sup> : 1167.9545, found: 1167.9547;

**7e**: (252 mg, 0.121 mmol, yield 85.6%). <sup>1</sup>H NMR (400 MHz, DMSO-d<sub>6</sub>): δ (ppm) 0.85 (t, J=6.4 Hz, 6H, -CH<sub>2</sub>CH<sub>3</sub>), 1.2-1.27 (m, 44H, -(CH<sub>2</sub>)<sub>11</sub>CH<sub>3</sub>), 1.33-1.42 (m, 4H, -NHCH<sub>2</sub>CH<sub>2</sub>), 1.81-2.02 (m, 8H, -CH<sub>2</sub>CH=CHCH<sub>2</sub>), 2.64-3.22 (m, 4H, -NHCH<sub>2</sub>-, 32H, -CH<sub>2</sub>- cyclen, 4H, -CH<sub>2</sub>- cystine), 3.22-3.47 (m, 4H, -NCH<sub>2</sub>CO), 4.44-4.54 (d, J=5.8 Hz, 2H, -CH- cystine), 5.07-5.58 (m, 4H, -CH=CH-); <sup>13</sup>C NMR (100 MHz, DMSO-d<sub>6</sub>) δ (ppm): 13.9, 22.2, 26.5, 28.9, 31.3, 40.7, 42.3, 42.7, 44.3, 49.2, 52.2, 54.4, 128.6, 132.0, 169.7, 171.0; HR-MS (ESI): C<sub>62</sub>H<sub>122</sub>N<sub>12</sub>O<sub>4</sub>S<sub>2</sub>, [M+H]<sup>+</sup>: 1163.9232, found: 1163.9233;

**7f**: (258 mg, 0.125 mmol, yield 87.7%). <sup>1</sup>H NMR (400 MHz, CDCl<sub>3</sub>): δ (ppm) 0.9 (t, J=6.7 Hz, 6H, -CH<sub>2</sub>CH<sub>3</sub>), 1.17-1.41 (m, 32H, CH<sub>3</sub>(CH<sub>2</sub>)<sub>3</sub>CH<sub>2</sub>- and -NHCH<sub>2</sub>CH<sub>2</sub>(CH<sub>2</sub>)<sub>5</sub>- of double chains), 1.41-1.54 (m, 4H, -NHCH<sub>2</sub>CH<sub>2</sub>-), 2.0-2.1 (m, 8H, -CH<sub>2</sub>CH=CH- and -CH=CHCH<sub>2</sub>- of double chains), 2.73-2.82 (t, J=6.5 Hz, 4H, -CH=CHCH<sub>2</sub>CH=CH-), 2.82-2.94 (m, 4H, -CH<sub>2</sub>-, cystine), 2.94-3.73 (m, 32H, -CH<sub>2</sub>-cyclen, 4H, -NHCH<sub>2</sub>-, 4H, -NHCH<sub>2</sub>CO-), 4.76 (m, 2H, -CH-, cystine), 5.20-5.44 (m, 8H, -CH=CH-), 7.91 (s, 2H, -CONH-), 8.5 (s, 2H, -CONH-, cystine); <sup>13</sup>C NMR (100 MHz, DMSO-d<sub>6</sub>) δ (ppm): 14.4, 22.4, 25.6, 26.9, 27.0, 29.4, 31.4, 42.9, 44.8, 49.6, 115.8, 118.8, 128.2, 130.2, 158.8, 159.1, 169.5, 171.9; HR-MS (ESI): C<sub>50</sub>H<sub>100</sub>N<sub>10</sub>O<sub>6</sub>S<sub>2</sub>, [M+H]<sup>+</sup> : 1001.7341, found: 1001.7344;

**7g**: (257 mg, 0.135 mmol, yield 86.2%). <sup>1</sup>H NMR (400 MHz, CDCl<sub>3</sub>): δ (ppm) 0.90 (t, J=6.8 Hz, 6H, -CH<sub>2</sub>CH<sub>3</sub>), 1.22- 1.36 (m, 40H, -CH<sub>3</sub>(CH<sub>2</sub>)<sub>10</sub>CH<sub>2</sub>- of double chains), 1.60-1.68 (m, 4H, -OCH<sub>2</sub>CH<sub>2</sub>-), 2.82-2.97 (m, 4H, -CH<sub>2</sub>-,cystine), 2.97-3.73(m, 32H, -CH<sub>2</sub>- cyclen, 4H, -NHCH<sub>2</sub>CO-), 4.13 (t, J=6.5 Hz, 4H, -COOCH<sub>2</sub>-), 4.77 (d, J=4.9 Hz, 2H, CH-cystine), 8.15 (s, 2H, -CONH-, cystine); <sup>13</sup>C NMR (100MHz, DMSO-d<sub>6</sub>) δ (ppm): 14.4, 22.5, 25.7, 28.4, 29.5, 32.8, 42.8, 44.8, 49.5, 65.6, 158.7, 170.5, 171.9; HR-MS (ESI): C<sub>50</sub>H<sub>100</sub>N<sub>10</sub>O<sub>6</sub>S<sub>2</sub>, [M+H]<sup>+</sup> : 1001.7341, found: 1001.7344;

**7h**: (265 mg, 0.127 mmol, yield 90.0%). <sup>1</sup>H NMR (400 MHz, CDCl<sub>3</sub>): δ (ppm) 0.89 (t, J=6.6 Hz, 6H, -CH<sub>2</sub>CH<sub>3</sub>), 1.17-1.39 (m, 44H, -CH=CHCH<sub>2</sub>(CH<sub>2</sub>)<sub>6</sub>CH<sub>3</sub> and -CH=CHCH<sub>2</sub>(CH<sub>2</sub>)<sub>5</sub>CH<sub>2</sub>NH- of double chains), 1.55-1.72 (m, 4H, -OCH<sub>2</sub>CH<sub>2</sub>-), 2.0 (m, 8H, -CH<sub>2</sub>CH=CHCH<sub>2</sub>-), 2.67-3.38 (m, 32H, -CH<sub>2</sub>-, cyclen, 4H, -CH<sub>2</sub>-,cystine), 3.38-3.64 (m, 4H, -NHCH<sub>2</sub>CO-), 4.10 (s, 4H, -COOCH<sub>2</sub>-), 4.76 (m, 2H, -CH-cystine), 5.30-5.43 (m, 4H, -CH=CH-), 7.80-8.00 (s, 2H, -CONH- ); <sup>13</sup>C NMR (100 MHz, DMSO-d<sub>6</sub>) δ (ppm): 14.3, 22.5,

25.7, 27.0, 28.4, 29.0, 29.6, 31.7, 42.8, 43.1, 44.7, 49.5, 51.8, 54.6, 65.6, 115.2, 118.2, 121.1, 130.1, 158.8, 170.5, 171.9; HR-MS (ESI):  $C_{62}H_{120}N_{10}O_6S_2$ ,  $[M+H]^+$ : 1165.8906, found:1165.8916;

**7i**: (240 mg, 0.116 mmol, yield 81.5%).  $^1H$  NMR (400 MHz,  $CDCl_3$ ):  $\delta$  (ppm) 0.9 (t,  $J=6.8$  Hz, 6H,  $-CH_2CH_3$ ), 1.26-1.35 (m, 28H,  $CH_3(CH_2)_3CH_2-$  and  $-OCH_2CH_2CH_2(CH_2)_4-$  of double chains), 1.60-1.70 (m, 4H,  $-OCH_2CH_2-$ ), 2.0-2.12 (m, 8H,  $-CH_2CH=CH-$  and  $-CH=CHCH_2-$  of double chains), 2.73-3.28 (m, 4H,  $-CH=CHCH_2CH=CH-$ ), 2.8-3.39 (m, 32H,  $-CH_2-$ , cyclen), 4.11 (s, 4H,  $-COOCH_2-$ ), 4.77 (m, 2H, CH-cystine), 5.27-5.45 (m, 8H,  $-CH=CH-$ ), 7.87 (s, 2H,  $-CONH-$ );  $^{13}C$  NMR (100 MHz,  $DMSO-d_6$ )  $\delta$  (ppm): 14.3, 19.0, 22.4, 25.7, 27.0, 28.4, 29.0, 29.5, 31.4, 42.8, 43.1, 44.8, 49.5, 56.5, 65.6, 115.1, 118.1, 158.9, 159.2, 170.5, 171.8; HR-MS (ESI):  $C_{62}H_{116}N_{10}O_6S_2$   $[M+H]^+$ : 1161.8593; found: 1161.8604;

**7j**: (260 mg, 0.112 mmol, yield 90.0%).  $^1H$  NMR (400 MHz,  $DMSO-d_6$ ):  $\delta$  (ppm) 0.55-2.40 (m, 86H, cholesterol skeleton), 2.69-3.2 (m, 32H,  $-CH_2-$ , cyclen, 4H,  $-CH_2-$ , cystine), 3.34 (m, 4H,  $-CH_2CONH-$ ), 4.54 (m, 2H,  $-CH-$ , cystine), 5.33 (m, 2H, chol), 8.90 (s, 2H,  $-CONH-$ );  $^{13}C$  NMR (100 MHz,  $DMSO-d_6$ )  $\delta$  (ppm): 12.1, 19.0, 19.4, 22.8, 23.1, 23.7, 27.8, 31.8, 35.7, 36.5, 42.3, 42.8, 44.7, 49.5, 49.9, 56.6, 139.6, 158.7, 159.0, 169.9, 171.9; HR-MS (ESI):  $C_{80}H_{140}N_{10}O_6S_2$ ,  $[M+H]^+$ :1402.0477, found: 1402.0465;

**7k**: (238 mg, 0.099 mmol, yield 83.0%).  $^1H$  NMR (400 MHz,  $DMSO-d_6$ ):  $\delta$  (ppm) 0.68-0.95 (m, 24H,  $-CHCH_3$ , tocopheryl), 0.85-1.22 (m, 36H,  $-(CH_2)_9-$  tocopheryl), 1.36-1.48 (s, 6H,  $-CH_3$  tocopheryl), 1.59-1.71 (m, 4H,  $CH_2-$ , tocopheryl), 1.71-1.96 (s, 18H,  $-CH_3$ , tocopheryl), 2.58-2.62 (t, 4H,  $-CH_2-$ , tocopheryl), 2.66-3.46 (m, 32H,  $-CH_2-$  cyclen, 4H,  $-CH_2-$ , cystine, 4H,  $-CH_2CONH-$ ), 4.8 (m, 2H,  $-CH-$ , cystine), 9.0 (s, 2H,  $-CONH-$ );  $^{13}C$  NMR (100 MHz,  $DMSO-d_6$ )  $\delta$  (ppm): 11.8, 12.3, 13.1, 19.9, 20.1, 22.9, 24.6, 27.8, 32.5, 37.1, 42.8, 44.8, 49.2, 75.3, 115.4, 118.4, 140.4, 158.7, 159.1, 169.2, 171.1; HR-MS (ESI):  $C_{84}H_{148}N_{10}O_8S_2$ ,  $[M+H]^+$ : 1490.1001, found: 1490.1001;

**9**: (621 mg, 1 mmol, yield 51.6%).  $^1H$  NMR (400 MHz,  $CDCl_3$ ):  $\delta$  (ppm) 1.25 (t,  $J = 7.1$  Hz, 3H,  $-CH_3$ ), 1.42-1.46 (d,  $J=14.4$  Hz, 27H,  $-Boc$ ), 2.52-2.91 (s, 4H, cyclen), 3.24 (s, 2H,  $-NCH_2CO-$ ), 3.31-3.62 (m, 12H, cyclen), 3.97 (d,  $J=5.7$  Hz, 2H,  $-NHCH_2CO-$ ), 4.17 (q,  $J=7.1$  Hz,  $-COOCH_2CH_3$ ), HR-MS (ESI):  $C_{29}H_{53}N_5O_9$ ,  $[M+H]^+$ : 616.3922, found: 616.3926;

**10**: (589 mg, 0.662 mmol, yield 84.9%).  $^1H$  NMR (400 MHz,  $CDCl_3$ ):  $\delta$  (ppm) 0.89 (t,  $J=6.8$  Hz, 3H,  $-CH_3$ ), 1.22-1.33 (m, 18H,  $-CH_2-(CH_2)_9-CH_3$ ), 1.40-1.54 (d,  $J = 18.9$  Hz, 27H,  $-Boc$ ), 1.64-1.73 (m, 2H,  $-NHCH_2CH_2-$ ), 2.45-2.79 (m, 4H, cyclen), 3.14-3.29 (m, 4H,  $-NCH_2CO-$  and  $-CONHCH_2-$ ), 3.29-3.78 (m, 12H, cyclen), 3.97 (d,  $J=21.7$  Hz, 2H,  $-NHCH_2CO-$ );  $^{13}C$



NMR (100 MHz, CDCl<sub>3</sub>)  $\delta$  (ppm) 14.1, 18.4, 22.7, 26.8, 29.2, 29.6, 31.9, 39.5, 43.6, 58.3, 168.9, 171.6; HR-MS (ESI): C<sub>39</sub>H<sub>74</sub>N<sub>6</sub>O<sub>8</sub>, [M+H]<sup>+</sup>: 755.5645, found: 755.5641;

**7I**: (145 mg, 0.159 mmol, yield 80.0%). <sup>1</sup>H NMR (400 MHz, DMSO-d<sub>6</sub>):  $\delta$  (ppm) 0.88 (t, J=6.7 Hz, 3H, -CH<sub>3</sub>), 1.22-1.33 (m, 18H, -CH<sub>2</sub>-(CH<sub>2</sub>)<sub>9</sub>-CH<sub>3</sub>) 1.45 (m, 2H, -NHCH<sub>2</sub>CH<sub>2</sub>-), 2.54-3.45 (m, 4H, -NCH<sub>2</sub>CO-, 2H, -CONHCH<sub>2</sub>-, 16H, cyclen), 3.87 (d, 2H, -NHCH<sub>2</sub>CO-); <sup>13</sup>C NMR (100 MHz, DMSO-d<sub>6</sub>)  $\delta$  (ppm): 14.4, 22.5, 26.9, 29.2, 29.5, 31.7, 42.4, 42.9, 43.3, 44.7, 50.0, 55.6, 168.6, 172.8; HR-MS (ESI): C<sub>24</sub>H<sub>50</sub>N<sub>6</sub>O<sub>2</sub>, [M+H]<sup>+</sup>: 455.4073, found: 455.4071;
